# Supplementary material for: The Functional Characterization of a Site-Specific Apigenin 4′-O-methyltransferase Synthesized by the Liverwort Species Plagiochasma appendiculatum
Source: PubMed Central journal article supplement (PMC6154639; doi:10.3390/molecules22050759), 2017-05-07
Supplement: molecules-22-00759-s001.pdf [file molecules-22-00759-s001.pdf]

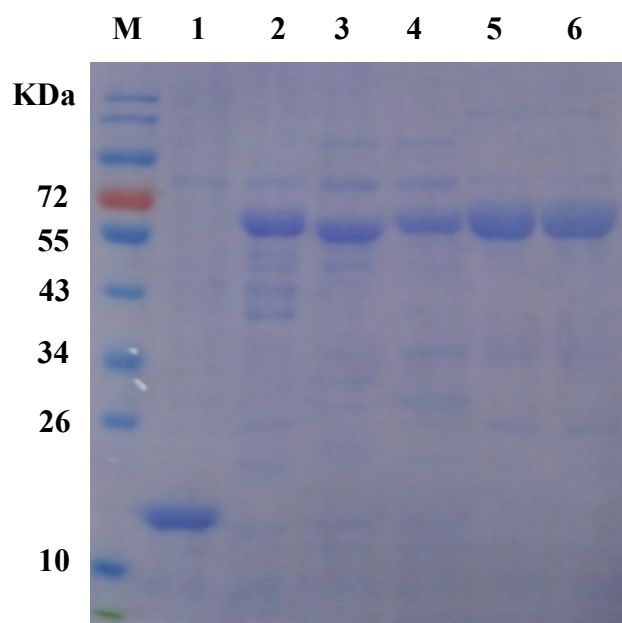

**Figure S1.** SDS-PAGE analysis of recombinant proteins. Each lane was loaded with the output of *E. coli* cells harboring a transgene construct. Lane 1: pET32a (empty vector control), lane 2: PaF4'OMT, lane 3: PaCOMT1-Tr, lane 4: PaCOMT2, lane 5: PaCOMT3, lane 6: PaCOMT4. M: molecular mass standards.

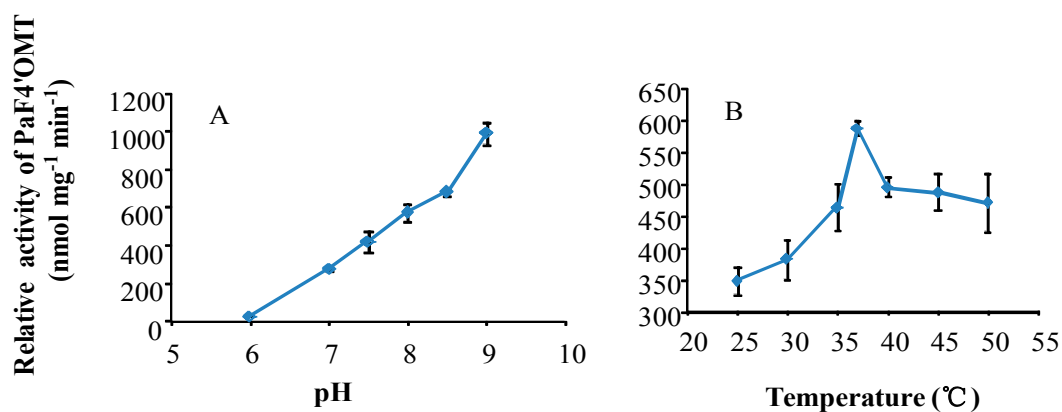

**Figure S2.** The effect of varying the pH and temperature on enzyme activity.

**Table S1** Sequences of oligonucleotide primers used for 3' RACE.

| Primer name   | Primer sequences (5' to 3') |
|---------------|-----------------------------|
| PaCOMT2-GSP-1 | ACCCTGGGCACTGAAGGCTGTTGTGA  |
| PaCOMT2-GSP-2 | CGCCGTATCTATCCTGGAGCGCGTCA  |

---

|               |                           |
|---------------|---------------------------|
| PaCOMT2-GSP-3 | TGGCCGTTCTCCACAACAACAGCGA |
|---------------|---------------------------|

---

**Table S2** Sequences of oligonucleotide primers used for cDNA cloning.

---

| Primer name  | Primer sequences (5' to 3') |
|--------------|-----------------------------|
| PaCOMT1-F1   | TATTGAGGACGCCGAGAG          |
| PaCOMT1 -R1  | CAGCGTAGAATGGATATG          |
| PaCOMT2 -F1  | CCTCCACATCGTCCATAGT         |
| PaCOMT2 -R1  | CAGAATACCAAGCAGCAAC         |
| PaCOMT2 -F2  | GCAGACGAGTGTGAGAGAC         |
| PaCOMT3-F1   | AAGCGGTCTGTTAGTGAC          |
| PaCOMT3-R1   | CGGGAGTTGTTGTCTGAG          |
| PaCOMT4 -F1  | CTCCAAAACCTTCGAGCT          |
| PaCOMT4 -R1  | CAGTATCCTATGGCACC           |
| PaCOMT4 - F2 | TATTTGAGTGCTAGCCAG          |
| PaCOMT4 -R2  | GACATTTGCCTCAGTGCT          |

---

**Table S3** Sequences of oligonucleotide primers used for heterologous expression.

---

| Primer name   | Primer sequences (5' to 3')   |
|---------------|-------------------------------|
| PaCOMT1-PF    | CGGGATCCATGGCGGTATCCACGAATGG  |
| PaCOMT1-PR    | CCCTCGAGCTACTTCCGGACCTCTATGA  |
| PaCOMT1-Tr-PF | CGGGATCCATGTCTGTTAGCGCCAATGT  |
| PaCOMT2-PF    | CGGGATCCATGTCAATAGCCATGAGTGG  |
| PaCOMT2-PR    | CCCAAGCTTTCAGTGCTGAATTTTACGGA |
| PaCOMT3-PF    | CGAGCTCATGGTCCCACAAGATCAAAG   |
| PaCOMT3-PR    | CCCTCGAGTCAAGACATGGGAACTTCGA  |
| PaCOMT4-PF    | GGAATTCATGGTCCCACAAGATCAAAG   |

---

---

PaCOMT4-PR

CCCTCGAGTCAAGACATGGGAACTTCGA

---
